# Supplementary material
Source: publisher site journal article supplement (http://www.degruyter.com/publication/journal_key/IJAMH/downloadAsset/IJAMH_Instructions_for_Authors.pdf)
Supplement: Supplementary file 1 [file IJAMH_Instructions_for_Authors.pdf]

# **International Journal of Adolescent Medicine and Health – Instructions for Authors**

## **I. Editorial policy**

The *International Journal of Adolescent Medicine and Health* is a peer-reviewed journal and publishes review articles, original articles, case reports, short communications, letters to the editor and book reviews.

Manuscripts are independently reviewed by peers selected by the Editors. Decisions are reached as quickly as possible. The *International Journal of Adolescent Medicine and Health* aspires to notify authors within eight weeks from submission date. When manuscripts are accepted subject to revision, the revised manuscript should be returned within approx. two months. Accepted papers are promptly published online ahead-of-print as soon as they have been finally processed. As per De Gruyter policy, no author list changes are permitted after acceptance of the article. The De Gruyter production team is instructed to enforce this policy during the production/proofing process.

Reviewers: The authors should provide the names and e-mail addresses of up to five potential reviewers. Authors may also indicate names of reviewers whom they wish to be excluded from reviewing their manuscripts.

### **Unpublished material**

Submission of a manuscript to the *International Journal of Adolescent Medicine and Health* implies that the work described is not copyrighted, published or submitted elsewhere, except in abstract form. The corresponding author should ensure that all authors approve the manuscript before its submission to International Journal of Adolescent Medicine and Health.

### **Ethical conduct of research**

The authors must describe and confirm safeguards to meet ethical standards.

Conflict of interest: When authors submit a manuscript, they are responsible for recognizing and disclosing financial and/or other conflicts of interest that might bias their work and/or could inappropriately influence his/ her judgment. If no specified acknowledgement is given, the Publishers assume that no conflicts of interest exist.

### **Copyright**

Manuscripts are accepted on condition of transfer of copyright (for U.S. government employees: to the extent transferable) to the *International Journal of Adolescent Medicine and Health*. Once the manuscript is accepted, it may not be published elsewhere without the consent of the copyright holders.

## **II. Submission of manuscripts**

Please submit manuscripts at <http://mc.manuscriptcentral.com/ijamh>.

### **Preparation of manuscripts**

#### **Language**

Manuscripts should be written in clear and concise English. Please have your text proofread by a native English speaker before you submit it for consideration. At the proof stage, only minor changes other than corrections of printers' errors are allowed.

#### **General format and length**

Please avoid footnotes in the text, use parentheses instead. Abstracts should not exceed 250 words and should incorporate data on background, objective or hypothesis, subjects, methods, results and conclusion. Please add at least three keywords. Short Communications should be structured as an extended abstract, not exceeding four typed pages including up to six references, one table and/or one figure. Original articles should not exceed 5000 words, Review articles should not exceed 6000 words.

One printed page is approx. 4000 characters. Each full page of printed text corresponds to approximately 630 words. Allow space for tables and illustrations within the page limit.

#### **Nomenclature**

Laboratory values should be described in both the International System of Units (SI units) and in metric units in parentheses.

#### **Cover letter**

Each manuscript should be accompanied by a cover letter containing a brief statement by the authors as to the element of novelty of their research.

**Articles** should have Title page, Abstract, Keywords, Introduction, Materials and methods, Results, Discussion, Acknowledgements and List of non-standard abbreviations, if applicable, References, Table and Figure Legends, if applicable.

#### **References**

Within the text references should be cited consecutively (enclosing the number in parenthesis) in the text and listed in the same numerical order at the end of the paper. The Vancouver Style is required (<http://www.icmje.org/>). The first reference in the text should be (1) and the next (2) and so forth and then listed accordingly at the end of the paper after discussion or after acknowledgements. Adhere strictly to the reference style of the Journal (Vancouver). All references mentioned in the Reference list must be mentioned in the text, and vice versa. List and number the references consecutively in the order that they appear in the text. List the names of all authors (et al ONLY after author number six).

Journal article: Bui ER, Goodson P. Predictors of adolescent sexual behavior and intention: A theory guided systematic review. *J Adolesc Health* 2007;40(1):4-21.

Book: Kahn CR, Weir GC, editors. *Joslin's diabetes mellitus*, 13th ed. Philadelphia: Lea and Febiger, 1994.

Chapter: Karnofsky DH, Burchenal JH. The clinical evaluation of chemotherapeutic agents in cancer. In: Macleod CM, ed. *Evaluation of chemotherapeutic agents*. New York: Columbia University Press, 1949:191-205.

Website: World Health Organization. WHO information for laboratory diagnosis of pandemic (H1N1) 2009 virus in humans update. Available at: <http://www.who.int/csr/resources/publications/>

International standard for journal names

In the PubMed Journal data base you will find the international abbreviation for journal names:  
<http://www.ncbi.nlm.nih.gov/nlmcatalog/journals>

### **Tables**

Submit tables on separate pages and number them consecutively using Arabic numerals. Provide a short descriptive title, column headings, and (if necessary) footnotes to make each table self-explanatory. Refer to tables in the text as Table 1, etc. Use Table 1, etc. in the table legends.

### **Figures**

Authors are encouraged to submit illustrations in color if necessary for their scientific content. Publication of color figures is provided free of charge both in online and print editions.

### **General requirements**

All illustrations must be of reproduction-ready quality. They will be reduced in size to fit, whenever possible, the width of a single column. Lettering of all figures within the article should be uniform in style (preferably a sans serif typeface like Helvetica) and of sufficient size (ca. 8 pt.). Uppercase letters A, B, C, etc. should be used to identify parts of multi-part figures. Cite all figures in the text in numerical order. Indicate the approximate placement of each figure. Do not embed figures within the text body of the manuscript; submit figures in separate files.

**Halftone figures (grayscale and color)** should have a minimum resolution of 300 dpi and be of good contrast.

**Line drawings** must be of reproduction-ready quality. Please note that faint shading may be lost upon reproduction. When drawing bar graphs, use patterning instead of grayscales. Lettering of all figures should be uniform in style. A resolution of 1200 dpi is recommended.

### **Figure legends**

Provide a short descriptive title and a legend to make each figure self-explanatory on separate pages. Explain all symbols used in the figures. Remember to use the same abbreviations as in the text body.

### **Permissions**

It is the authors' responsibility to obtain permission to reproduce original or modified material that has been previously published.

### **Offprints**

The electronic files of typeset articles in Adobe Acrobat PDF format are provided free of charge; corresponding authors receive notification that their article has been published online. Paper offprints can be ordered in addition; an offprint order form will accompany the page proofs and should be completed and returned with the corrected proofs immediately.

### **Note for authors of NIH-funded research**

De Gruyter acknowledges that the author of a US-agency-funded article retains the right to provide a copy of the final manuscript to agency upon acceptance for publication or thereafter, for public archiving in PubMed Central 12 months after publication in the *International Journal of Adolescent Medicine and Health*. Note that only the accepted author's version of the manuscript, not the PDF file of the published article, may be used for NIH archiving.

### **Please contact the Editorial Office with any further questions:**

Editorial Office  
*International Journal of Adolescent Medicine and Health*  
Walter de Gruyter GmbH  
Genthiner Straße 13  
10785 Berlin, Germany  
<https://www.degruyter.com/view/journals/ijamh/ijamh-overview.xml>
